# Supplementary material for: 244-MPT overcomes gefitinib resistance in non-small cell lung cancer cells
Source: PubMed Central journal article supplement (PMC4792556; doi:10.18632/oncotarget.6236), 2015-10-26
Supplement: oncotarget-06-44274-s001.pdf [file oncotarget-06-44274-s001.pdf]

## 244-MPT overcomes gefitinib resistance in non-small cell lung cancer cells

### Supplementary Materials

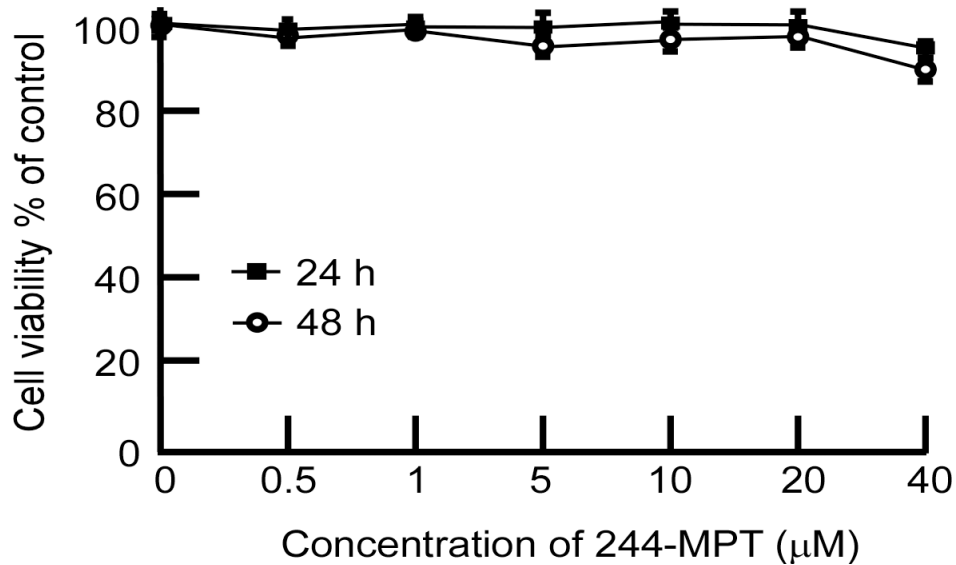

**Supplementary Figure S1: 244-MPT is not toxic to cells up to 40 µM.** Cytotoxicity of 244-MPT was measured by MTS assay in MRC-5 cells, a normal lung cell line. The control group was only treated with 0.1% DMSO, the solvent to dissolve 244-MPT. MRC-5 cells were treated with different concentrations of 244-MPT for 24 or 48 h.



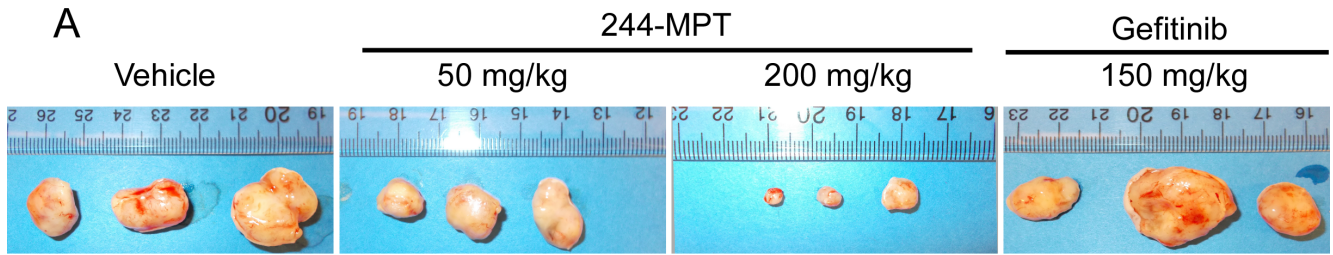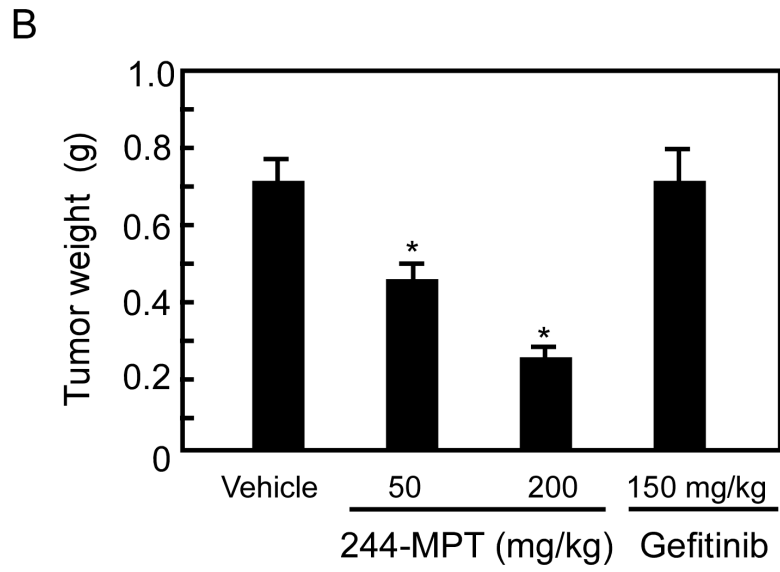

**Supplementary Figure S3: 244-MPT inhibits tumor growth in a gefitinib-resistant NSCLC xenograft mouse model.** After mice were euthanized, (A) tumor volume and (B) weight were measured. The 244-MPT treated groups exhibited significantly lower tumor volume and weight compared with the vehicle-treated group. Gefitinib treatment had no effect. The asterisk (\*) indicates a significant ( $p < 0.05$ ) decrease in tumor weight of 244-MPT-treated mice compared to vehicle-treated mice.
